# Supplementary material for: Arbuscular Mycorrhizal Fungi and Nutrition Determine the Outcome of Competition Between Lolium multiflorum and Trifolium subterraneum
Source: Frontiers journal article supplement (doi:10.3389/fpls.2021.778861), 2021-12-23
Supplement: Data_Sheet_1.pdf [file Data_Sheet_1.pdf]

## Supplementary Material

### Supplementary Figures

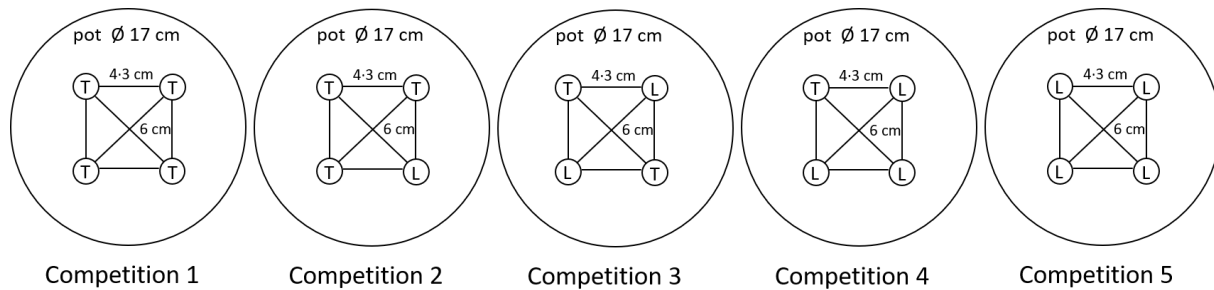

**Figure S1:** Planting design and competition levels, with T = *Trifolium subterraneum* and L = *Lolium multiflorum*. Neighboring plants had a distance of approximately 4.3 cm and diagonally arranged plants a distance of approximately 6 cm.

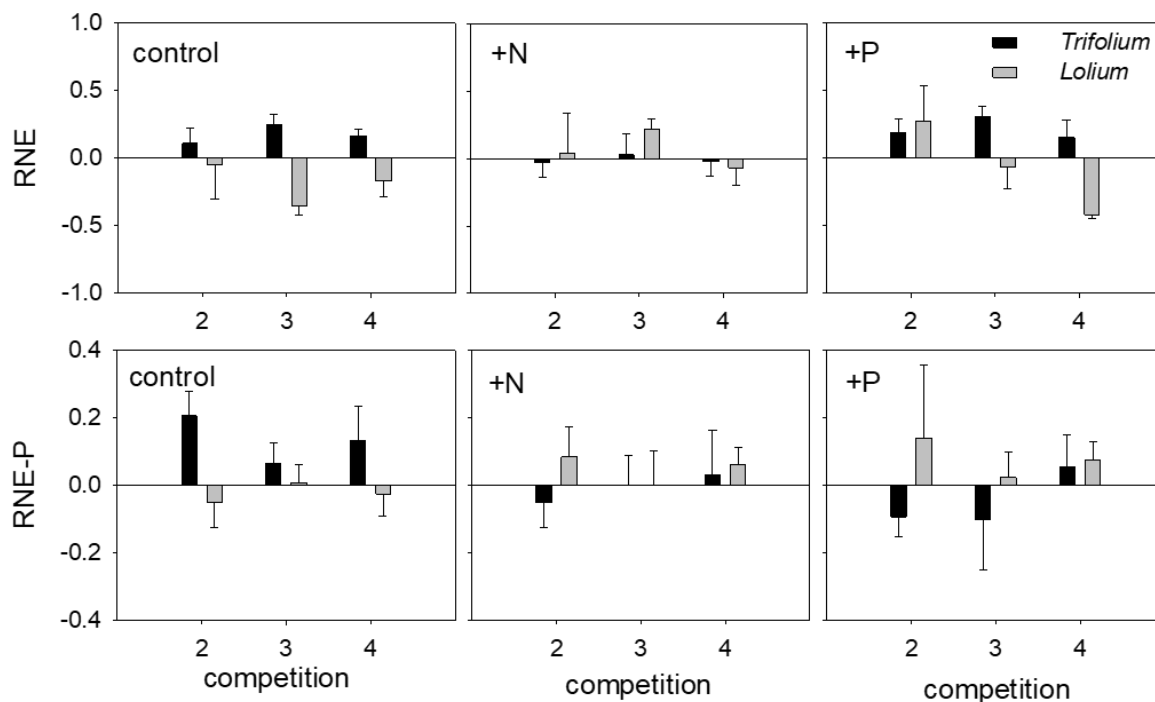

**Figure S2:** Relative neighbor effect (RNE) and relative neighbor effect for P-competition (RNE-P) of non-mycorrhizal (NM) *Trifolium subterraneum* (■) and *Lolium multiflorum* (■), subjected to standard fertilization (control), enhanced N fertilizer (+N) or enhanced P fertilizer (+P), in the competition treatments 2, 3 and 4. Data represent mean  $\pm$  standard error,  $n = 5$ .

## Supplementary Tables

**Table S1:** Composition of the modified Hoagland nutrient solution (Hoagland and Arnon 1950) for the control (standard fertilizer), enhanced phosphate content (+P fertilizer), or the enhanced nitrogen content (+N fertilizer). Stock solutions were 1 M. Micronutrients and their stock solutions were  $\text{H}_3\text{BO}_3$  (25  $\mu\text{M}$ ),  $\text{MnSO}_4$  (2  $\mu\text{M}$ ),  $\text{ZnSO}_4$  (2  $\mu\text{M}$ ),  $\text{CuSO}_4$  (0.5  $\mu\text{M}$ ),  $\text{MoO}_3$  (0.5  $\mu\text{M}$ ).

| compound                                             | volume of stock solution (ml) |                  |                  |
|------------------------------------------------------|-------------------------------|------------------|------------------|
|                                                      | per liter for:                |                  |                  |
|                                                      | standard<br>fertilizer        | +P<br>fertilizer | +N<br>fertilizer |
| $\text{KNO}_3$                                       | 6                             | 5                | 10               |
| $\text{Ca}(\text{NO}_3)_2 \cdot 4\text{H}_2\text{O}$ | 2                             | 2.5              | 2                |
| $(\text{NH}_4)_2\text{SO}_4$                         | 1                             | 1                | 1                |
| $\text{KH}_2\text{PO}_4$                             | 0                             | 3                | 0                |
| $(\text{NH}_4)_2\text{HPO}_4$                        | 1                             | 1                | 1                |
| $\text{MgSO}_4 \cdot 7\text{H}_2\text{O}$            | 2                             | 2                | 2                |
| $\text{KCl}$                                         | 6                             | 4                | 2                |
| $\text{CaCl}_2$                                      | 0.5                           | 0                | 0.5              |
| $\text{NaCl}$                                        | 1.5                           | 2                | 1.5              |
| $\text{Na}_2\text{SO}_4$                             | 2                             | 2                | 2                |
| Fe-Citrat<br>( $\text{FeC}_6\text{H}_5\text{O}_7$ )  | 1                             | 1                | 1                |
| Micronutrients                                       | 1                             | 1                | 1                |

**Table S2:** Results of three-way ANOVA for factors competition (1-5), mycorrhization (NM, AM), and fertilization (control, +N, +P) on soil inorganic P and N. Data stated are P-values, with significant effects ( $P < 0.05$ ) given in bold. Different letters for the factors competition, and fertilization indicate significantly different means (Tukey HSD post-hoc,  $P < 0.05$ ).

|                                      | Soil P<br>(mg kg <sup>-1</sup> ) | Soil N<br>(mg kg <sup>-1</sup> ) |
|--------------------------------------|----------------------------------|----------------------------------|
| Competition (C)<br>(1,2,3,4,5)       | 0.61                             | <b>0.003</b><br>(a,ab,ab,b,b)    |
| Mycorrhization (M)                   | <b>&lt;0.001</b>                 | 0.53                             |
| Fertilization (F)<br>(control,+N,+P) | <b>&lt;0.001</b><br>(b,b,a)      | 0.83                             |
| C × M                                | 0.39                             | 0.40                             |
| C × F                                | 0.88                             | 0.95                             |
| M × F                                | 0.97                             | 0.95                             |
| C × M × F                            | 0.92                             | 0.83                             |

**Table S3:** Soil P (mg kg<sup>-1</sup>) in the non-mycorrhizal and mycorrhizal pots with standard fertilization (control), enhanced N fertilizer (+N) or enhanced P fertilizer (+P). As factor competition is not significant, values for the five competition treatments are pooled. Data represents mean ± standard error, n = 25. Different letters indicate significantly different means (Tukey HSD post-hoc,  $P < 0.05$ ).

| Mycorrhization /<br>Fertilization | Soil P<br>(mg kg <sup>-1</sup> ) |
|-----------------------------------|----------------------------------|
| NM, control                       | 5.11±0.380 b                     |
| NM, +N                            | 5.72±0.458 b                     |
| NM, +P                            | 7.83±0.604 a                     |
| AM, control                       | 3.33±0.189 c                     |
| AM, +N                            | 3.61±0.229 c                     |
| AM, +P                            | 5.38±0.433 b                     |

**Table S4:** Soil N ( $\text{mg kg}^{-1}$ ) in the five competition treatments. As factors mycorrhization and fertilization are not significant, average values are given for each of the five competition treatments. Data represents mean  $\pm$  standard error,  $n = 30$ . Different letters indicate significantly different means (Tukey HSD post-hoc,  $P < 0.05$ ).

| Competition | Soil N<br>( $\text{mg kg}^{-1}$ ) |
|-------------|-----------------------------------|
| 1           | 44.15 $\pm$ 4.244 a               |
| 2           | 32.22 $\pm$ 3.387 ab              |
| 3           | 30.07 $\pm$ 4.289 ab              |
| 4           | 26.66 $\pm$ 3.098 b               |
| 5           | 24.85 $\pm$ 2.295 b               |
